# Supplementary material for: Vaccine Hesitancy towards COVID-19 Vaccination: Investigating the Role of Information Sources through a Mediation Analysis
Source: MDPI journal article supplement (doi:10.3390/idr13030066), 2021-08-12
Supplement: s1 [file s1]

# Questionnaire instrument

Panel information already available:

- Age (years)
- Gender
- Educational level
- Employment status
- Number of family members

**1. You would define your family income as...**

- ☐ Lower than average
- ☐ On average
- ☐ Higher than average

**2. Do you have any of the following conditions? [select all that apply]**

- ☐ Cancer
- ☐ Immunocompromised state due to therapy or disease
- ☐ Obesity
- ☐ Diabetes (type 1 or 2)
- ☐ Cardiovascular disease
- ☐ Pulmonary disease
- ☐ Rheumatological condition

**3. If you have refused a vaccine in the past that was recommended to you by a healthcare worker - what was/were the reason(s)? [check all reasons that applied to that situation]**

- ☐ I never refused a vaccine recommended by a healthcare worker
- ☐ Did not think it was needed
- ☐ Did not have enough information on the vaccine
- ☐ Did not think the vaccine was effective
- ☐ Did not think the vaccine was safe
- ☐ I was concerned about side effects
- ☐ I had a bad experience with a previous vaccination
- ☐ Did not know where to get vaccination
- ☐ Other logistic problems

**4. How concerned are you of ...**

|                                                                                                                                                         | Not at all<br>concerned | A little<br>concerned | Somewhat<br>concerned | Very<br>concerned |
|---------------------------------------------------------------------------------------------------------------------------------------------------------|-------------------------|-----------------------|-----------------------|-------------------|
| Contracting COVID-19 at work?<br>(For example: office and other work settings that are not your home)                                                   |                         |                       |                       |                   |
| Contracting COVID-19 outside of work?<br>(For example: at the grocery store, when you are using transportation, or in other aspects of your daily life) |                         |                       |                       |                   |
| Infecting your family or friends with COVID-19?                                                                                                         |                         |                       |                       |                   |

5. **A COVID-19 vaccine has already been approved. If you were offered to get the vaccine in the next months - at no cost for you- how likely are you to take it?**
- Very likely
  - Somewhat likely
  - I am not sure
  - Somewhat unlikely
  - Very unlikely
  - I would not take it within the next two months but I might reconsider it in the future
6. **Which information sources have you mostly used to get information about the COVID-19 vaccine? Select up to 3 sources.**
- TV
  - Newspaper
  - Radio
  - Institutional websites
  - Social Media
  - Word of mouth (familiar, friends, colleagues...)

## Supplementary Results

**Table S1.** Correlation matrix of all variables considered for inclusion in the mediation model. Pairwise correlations are expressed by means of Cramér's *V*.

|                     | Gender   | Age group | High school or lower degree | Higher than average family income | Presence of comorb. | Past vaccination refusal | Concerns about getting infected at work | Concerns about getting infected outside of work | Concerns about infecting dear ones | TV as inform. source | Newspapers as inform. source | Radio as inform. source | Social media as inform. source | Institutional websites as inform. source | Word of mouth as inform. source | Vaccine hesitancy |
|---------------------|----------|-----------|-----------------------------|-----------------------------------|---------------------|--------------------------|-----------------------------------------|-------------------------------------------------|------------------------------------|----------------------|------------------------------|-------------------------|--------------------------------|------------------------------------------|---------------------------------|-------------------|
| Gender              | 1.000    |           |                             |                                   |                     |                          |                                         |                                                 |                                    |                      |                              |                         |                                |                                          |                                 |                   |
| Age group           | 0.202*** | 1.000     |                             |                                   |                     |                          |                                         |                                                 |                                    |                      |                              |                         |                                |                                          |                                 |                   |
| Education           | 0.014    | 0.151***  | 1.000                       |                                   |                     |                          |                                         |                                                 |                                    |                      |                              |                         |                                |                                          |                                 |                   |
| Income              | 0.112**  | 0.068     | 0.214***                    | 1.000                             |                     |                          |                                         |                                                 |                                    |                      |                              |                         |                                |                                          |                                 |                   |
| Comorbidities       | 0.006    | 0.226***  | 0.058                       | 0.090*                            | 1.000               |                          |                                         |                                                 |                                    |                      |                              |                         |                                |                                          |                                 |                   |
| Past refusal        | 0.061    | 0.113**   | 0.004                       | 0.139***                          | 0.043               | 1.000                    |                                         |                                                 |                                    |                      |                              |                         |                                |                                          |                                 |                   |
| Infected at work    | 0.088*   | 0.086**   | 0.072                       | 0.077                             | 0.069               | 0.075                    | 1.000                                   |                                                 |                                    |                      |                              |                         |                                |                                          |                                 |                   |
| Infected elsewhere  | 0.127*** | 0.034     | 0.017                       | 0.115***                          | 0.093*              | 0.061                    | 0.514***                                | 1.000                                           |                                    |                      |                              |                         |                                |                                          |                                 |                   |
| Infecting dear ones | 0.147*** | 0.116***  | 0.047                       | 0.066                             | 0.060               | 0.095*                   | 0.386***                                | 0.460***                                        | 1.000                              |                      |                              |                         |                                |                                          |                                 |                   |
| TV                  | 0.050    | 0.065     | 0.066*                      | 0.078*                            | 0.036               | 0.107**                  | 0.048                                   | 0.107**                                         | 0.073                              | 1.000                |                              |                         |                                |                                          |                                 |                   |
| Newspapers          | 0.067*   | 0.068     | 0.088**                     | 0.160***                          | 0.007               | 0.008                    | 0.026                                   | 0.068                                           | 0.060                              | 0.049                | 1.000                        |                         |                                |                                          |                                 |                   |
| Radio               | 0.061    | 0.069     | 0.008                       | 0.059                             | 0.027               | 0.001                    | 0.072                                   | 0.029                                           | 0.033                              | 0.037                | 0.063*                       | 1.000                   |                                |                                          |                                 |                   |
| Social media        | 0.059    | 0.082     | 0.046                       | 0.039                             | 0.060               | 0.001                    | 0.042                                   | 0.022                                           | 0.056                              | 0.103**              | 0.131***                     | 0.036                   | 1.000                          |                                          |                                 |                   |
| Institutional sites | 0.010    | 0.096*    | 0.019                       | 0.089*                            | 0.097**             | 0.027                    | 0.068                                   | 0.077                                           | 0.076                              | 0.175***             | 0.023                        | 0.101**                 | 0.087**                        | 1.000                                    |                                 |                   |
| Word of mouth       | 0.106**  | 0.068     | 0.013                       | 0.021                             | 0.010               | 0.032                    | 0.045                                   | 0.052                                           | 0.104                              | 0.074*               | 0.145***                     | 0.047                   | 0.042                          | 0.118***                                 | 1.000                           |                   |
| Hesitancy           | 0.037    | 0.119**   | 0.078*                      | 0.114**                           | 0.110***            | 0.329***                 | 0.114***                                | 0.188***                                        | 0.191***                           | 0.070*               | 0.056                        | 0.007                   | 0.102**                        | 0.118***                                 | 0.020                           | 1.000             |

\*\*\**p*-value ≤0.001; \*\**p*-value ≤0.01; \**p*-value ≤0.05.

**Table S2.** Standardized regression coefficients from final mediation model.

|                                   | Vaccine hesitancy |         | Institutional websites use |         | Social media use |         |
|-----------------------------------|-------------------|---------|----------------------------|---------|------------------|---------|
|                                   | estimate          | p-value | estimate                   | p-value | estimate         | p-value |
| Age (reference category ≥55y)     |                   |         |                            |         |                  |         |
| 18-34y                            | -0.018            | 0.707   | -0.003                     | 0.944   | <b>0.159</b>     | 0.003   |
| 35-44y                            | <b>0.146</b>      | 0.003   | -0.047                     | 0.333   | <b>0.131</b>     | 0.023   |
| 45-54y                            | 0.064             | 0.186   | <b>-0.120</b>              | 0.013   | 0.071            | 0.227   |
| High school or lower degree       | <b>0.115</b>      | 0.003   | -                          | -       | -                | -       |
| Higher than average family income | -                 | -       | <b>0.100</b>               | 0.013   | -                | -       |
| Presence of comorbidities         | <b>-0.163</b>     | <0.001  | <b>0.117</b>               | 0.003   | <b>0.115</b>     | 0.013   |
| Past vaccination refusal          | <b>0.380</b>      | <0.001  | -                          | -       | -                | -       |
| Perceived risk of infection       | <b>-0.213</b>     | <0.001  | <b>0.088</b>               | 0.040   | -                | -       |
| Social media use                  | <b>0.187</b>      | <0.001  |                            |         |                  |         |
| Institutional websites use        | <b>-0.140</b>     | 0.004   |                            |         |                  |         |

In bold significant coefficients. Fit indices: robust CFI=0.798, robust TLI=0.913, robust RMSEA=0.050 (95%CI: 0.041 – 0.060), SRMR=0.044.

**Table S3.** Standardized regression coefficients from final mediation model with the addition of perceived risk of infection as a mediator.

|                                   | Vaccine hesitancy |         | Institutional websites use |         | Social media use |         | Perceived risk of infection |         |
|-----------------------------------|-------------------|---------|----------------------------|---------|------------------|---------|-----------------------------|---------|
|                                   | estimate          | p-value | estimate                   | p-value | estimate         | p-value | estimate                    | p-value |
| Age (reference category ≥55y)     |                   |         |                            |         |                  |         |                             |         |
| 18-34y                            | 0.021             | 0.666   | -0.018                     | 0.703   | <b>0.159</b>     | 0.003   | <b>0.161</b>                | <0.001  |
| 35-44y                            | <b>0.173</b>      | <0.001  | -0.056                     | 0.250   | <b>0.131</b>     | 0.023   | <b>0.097</b>                | 0.022   |
| 45-54y                            | <b>0.093</b>      | 0.049   | <b>-0.130</b>              | 0.007   | 0.071            | 0.227   | <b>0.110</b>                | 0.009   |
| High school or lower degree       | <b>0.116</b>      | 0.003   | -                          | -       | -                | -       | -                           | -       |
| Higher than average family income | -                 | -       | <b>0.099</b>               | 0.014   | -                | -       | -                           | -       |
| Presence of comorbidities         | <b>-0.141</b>     | 0.001   | <b>0.107</b>               | 0.007   | <b>0.115</b>     | 0.013   | <b>0.108</b>                | 0.003   |
| Past vaccination refusal          | <b>0.382</b>      | <0.001  | -                          | -       | -                | -       | -                           | -       |
| Perceived risk of infection       | <b>-0.220</b>     | <0.001  | <b>0.091</b>               | 0.036   | -                | -       |                             |         |
| Social media use                  | <b>0.168</b>      | 0.002   |                            |         |                  |         |                             |         |
| Institutional websites use        | <b>-0.112</b>     | 0.026   |                            |         |                  |         |                             |         |

In bold significant coefficients. Correlation between social media use and institutional websites use:  $r = -0.173$ ,  $p = 0.002$ . Fit indices: robust CFI=0.906, robust TLI=0.953, robust RMSEA=0.037 (95%CI: 0.026 – 0.048), SRMR=0.028.
